# Supplementary material for: Large-scale automated emission measurement of individual vehicles with point sampling
Source: Copernicus journal article supplement (doi:10.5194/egusphere-2023-1279), 2023-07-28
Supplement: Supplementary file [file egusphere-2023-1279-AC2-supplement.pdf]

We gratefully thank the reviewer for carefully reading and providing feedback to our manuscript. Below we provide our point-to-point responses to the reviewer's comments. The comments by the reviewer are marked in **black**, responses are marked in **red** and changes to the manuscript are indicated in **blue**. The changes in the manuscript have not yet been completed and the revision of the manuscript is currently still ongoing.

---

#### General Comments:

This manuscript describes a sampling system that can be used to capture and evaluate in-use emissions by thousands of vehicles. The authors include detailed data that quantify the impact of important sampling location and configuration features and environmental conditions on the success rate of their point sampling method, and a first look at the emission trends that have been captured by this system. Such an automated platform for capturing on-road vehicle emissions and determining emission factors would be extremely useful for both regulators and researchers for tracking fleet trends and identifying high emitters.

The key innovation presented in this paper is their automated peak detection algorithm. However, not enough information is given for a reader to replicate this methodology independently, and this reviewer also has several questions about how the algorithm functions (see below). If the algorithm will be made publicly available and if the below questions/comments are addressed, then I believe that the manuscript could pair well with it. But if the algorithm will not enter the public domain, then I think the manuscript requires major revision to be a more complete methods paper that could be independently duplicated by others. Alternatively, if the authors do not intend for this paper to be a methodology paper, then less focus should be spent on the results for their sampling platform/algorithm performance and more should be spent on the vehicle emissions that were sampled. They have a rich dataset for tens of thousands of in-use vehicles at multiple locations in Europe, which could easily be the focus of the paper. The manuscript in its current form seems split between the two narratives and incomplete for both, and it would be more compelling and impactful to focus on either the method or the fleet results.

**We thank the reviewer for this very detailed review, comments and suggestions. This review is very helpful to improve the manuscript. As suggested, we will make the software framework public available as we also think that this can help researchers and institutions to further develop emission monitoring concepts. We answered the comments below and we revise the manuscript accordingly.**

---

#### Additional general comments:

Many acronyms are introduced but only used a couple of times (e.g., PC, PTI). This can be confusing for the reader, so this reviewer suggests only using those acronyms that are frequently used (e.g., HDVs, PS, etc.) and minimizing the introduction of others.

**We thank the reviewer for this input.**

**We reduced the usage of several acronyms in the revised manuscript such as PC, PTI, CPC, LoD.**

---

I did not think enough information was given about many important details for the algorithm and have many specific questions that are listed below. Overall, I have questions about:

- How the background concentrations are determined and applied
- Peak separation and overlap
- QA/QC steps and what is considered successful versus what is screened out of the analysis presented in Section 3.3

We thank the reviewer for this input and we will provide more details in the revised manuscript regarding these open questions. These questions are addressed by several comments and answers below.

---

This manuscript is well written, but is long and could be significantly shortened. In its current form, it's difficult for the reader to pull out the key results and insights. These are well summarized in the Conclusions, but they're otherwise not obvious with the current density of results, discussion, and figures. In many cases, results could be summarized more concisely with simpler statements like "results were comparable across all conditions" and the supporting figures could be moved to the Appendix, rather than describing them each in detail. In other cases, results and figures could be combined and presented together, rather than discussed in detail separately. For example, the results and discussion about sampling position and measurement location could be combined and streamlined to more directly and efficiently conclude that the capture rate is higher when you sample closer to the emission source.

We agree and we thank the reviewer for these suggestions. We agree that especially the interpretation and discussion of the measurement location and sampling position is too long and can be written more concisely.

We merged (old) sections "3.2.1 Sampling position" and "3.2.2 Measurement location" to "3.3.1 Measurement location". We described the results in a more compact form. We moved (old) figures 5a (Distribution of CO<sub>2</sub> concentrations of the sampling positions) and 9 (Background concentrations) into the Appendix (see comments below).

---

Specific Comments:

Introduction, Lines 20–24: Emission control system performance decline via tampering or malfunction is emphasized as the only source of high emissions of NO<sub>x</sub> and PM, whereas these high emissions can also simply come from older engines without these newer after-treatment controls (e.g., non-DPF-equipped vehicles). In other words, skewed fleet emissions and the high emitter problem are not solely due to degrading DPFs or SCR systems that have been tampered with or are failing.

We agree and we thank the reviewer for this input. A significant share of emissions come from old vehicles.

We adjusted the description in the introduction to: "*NO<sub>x</sub> emissions remain a widespread problem, especially for diesel-powered vehicles, where tampered, defective and old vehicles contribute to high emission levels (Meyer et al., 2023). For PM it is well known from literature, that a small share of vehicles (< 20 %) contribute to the vast amount (60-90 %) of emissions (Park et al., 2011; Burtscher et al., 2019; Boveroux et al., 2019; Bainschab et al., 2020). This is due to malfunction after-treatment*

*systems, such as defective diesel particulate filter (DPF) and old vehicles with outdated engine technologies and after-treatment systems.”*

---

Introduction, Lines 28 and 33: Is the interest really in PN concentrations (which vary with dilution) or emission rates?

We agree that you cannot purely look at concentrations. In remote emission sensing it makes no sense without reference quantity (e.g. CO<sub>2</sub>). But often concentrations are of interest or are even used for regulations. In environmental sensing concentration thresholds are used (e.g. PM<sub>2.5</sub>, PM<sub>10</sub>, NO<sub>x</sub>) by authorities (e.g. EU) for monitoring the current situation and sanctioning member states. During the periodical technical inspections of vehicles, exhaust measurements are performed directly at the tailpipe to check whether the vehicle complies with the regulations. Therefore, for example in Germany for Euro 6 vehicles a PN threshold of 250.000 particles/cm<sup>3</sup> is defined.

We adapted Line 28 to: *“Particle number (PN) and black carbon (BC) are two PM metrics of particular interest.”*

Line 33: PN concentration measurements on the exhaust pipes are of interest for the periodic technical inspections.

---

Methods, Figure 1 and Lines 108–109: How do you functionally position the sample inlet in the middle of the road where cars are driving? I’m assuming you put some sort of rigid protector over the tubing that vehicles drive over. But does that alter how they are operating (e.g., slow down while passing by, etc.), or is it small/inconspicuous enough that vehicles do not “see” it and do not change their driving patterns.

The sampling tube was put into a small cable duct (height: 2 cm, width: 13 cm) which was then fixed with duct tape onto the road.

We did not observe a significant influence on the driving behaviour with our setup and with this sample extraction from the road centre. We did observe an influence on the driving behaviour when people were standing outside or a camera was located next to the road (our camera was in the drivers cabin).

In section “2.1 Measurement setup” – “emission measurement” – “sampling” we added: *“When sampling from the center of the road we cover the tube with a small cable duct that is taped to the road.”*

In section “3.3.1 Measurement location” we added: *“We did not observe a significant influence on the driving behavior when the sampling was done from the center of the road through the covered tube.”*

Methods, Table 1: For vehicles without SCR or inactive SCR systems, NO<sub>x</sub> concentrations can be even more elevated, up to ~10 ppm.

We thank the reviewer for this note. Indeed, there are individual vehicles (< 10) where we measured concentrations greater than 5 ppm (including dilution). We adjusted the recommended range for NO<sub>x</sub> in Table 1 up to 10 ppm.

---

Why is the algorithm called TUG-PDA? PDA is defined as peak detection algorithm, but TUG is not defined.

As „peak detection algorithm” is very generic we wanted to have a specific name for the algorithm and added TUG which stands for “Technische Universität Graz” (german name of the university). Therefore we wrote in the abstract “our” PDA.

We will mention this in the revised manuscript.

---

Is TUG-PDA deployed in real-time, or is it used after data is collected? In other words, are peaks being detected and integrated live, or is this used as a post-processing step after data has been collected?

The algorithm is applied during post-processing. But could be in principle be applied in (near) real time with a delay of some seconds because of sampling and instrument delay.

---

Methods, Lines 180–181: If you smooth the data, does that not affect the peak area for the emission factor calculation?

Yes, it slightly affects the results but single measurement failures (outliers) from instruments are smoothed and the PDA algorithm is affected by short dips or peaks in concentration data. Currently, the data is smoothed with a rolling gauss filter for 5 samples (2.5 s). If this is done over a larger sample set (e.g. to match slower with faster instruments), the influence will increase.

---

Methods, Lines 195–207: I found the discussion and figures in Appendix C to be very helpful for better understanding how TUG-PDA operates, and suggest moving them (or a streamlined version of them) up to the main manuscript.

We thank the reviewer for this input.

We moved Appendix C into the results section to “3.1 TUG-PDA emission separation capabilities”. We have reworded the section for better understanding.

---

A 3-second delay seems really small between vehicles, when most peak events occur over 5–10 seconds. The only concern listed was misattribution of the captured pollutant peaks to the incorrect vehicle, rather than overlapping peak events. You detail peak separation in Appendix C, but not enough information is given here. How can your algorithm distinguish between vehicles if the CO<sub>2</sub> and pollutant concentrations do not return to background before starting a new peak integration?

It's unclear to me how you can get accurate integrations when peaks overlap with vehicles passing in rapid succession. Even if you assume a background concentration, the tails of the peak itself will be cut off. How are you certain that you have an accurate emission ratio under these circumstances?

We thank the reviewer for these questions. It is true that the emission calculations get more inaccurate with overlapping plumes. But we found that statistics are not significantly affected by overlapping plumes if the parameters of the algorithm are deliberately set such that the plumes can be separated properly (in accordance with e.g. instrument response times). How the PDA algorithm is configured is also a trade-off between statistics (number of samples) and increasing inaccuracies. We are sure that improvements on the plume separation can be made which should be addressed in the future. The plume separation can be adapted in the framework with several parameters such as:

- "Minimum time to next vehicle" → Sets the minimum distance between vehicles up to which the PDA attempts to resolve the emissions.
- "Minimum number of required samples for valid measurement" → Sets the minimum number of samples required for a measurement to be valid.
- "Time delta for previous vehicle check" → Defines the time up to which the PDA "looks back" to the previous vehicle and checks if the emission could interfere with the current vehicle.

This can be very useful to adapt the post-processing for locations with dense traffic or low traffic to get sufficient number of samples. The plume separation capability of the algorithm enables the application to sampling locations with also higher traffic volumes.

We will add a section in the revised manuscript showing the differences between statistics including overlapping plumes with the default PDA parameters and with a more "conservative" parameter setting that minimizes plume overlaps.

In the new results section "3.1 TUG-PDA emission separation capabilities" we provide more information regarding the possibilities and difficulties of the plume separation.

In the software default parameters are defined which are also stated in the revised manuscript. We provide recommendations for parameter tuning (example for a more "conservative" setting) and that more relaxed parameters should only be set with care.

---

Have you characterized how different fractions of peaks captured and assumed baseline concentrations impact resulting emission factors, using the subset of peak events that were 100% isolated with all pollutants starting and ending at the background condition?

We thank the reviewer for this suggestion. We have not evaluated that in detail, but that is a very interesting suggestion for future investigations.

---

It's unclear to me how TUG-PDA defines the start and stop time of peak events. Do the CO<sub>2</sub> start/stop times define the peak event, and then those are mapped onto each pollutant time series with the previously determined time adjustments due to different instrument responses? Or are the CO<sub>2</sub> and pollutant peaks handled independently by the algorithm, with CO<sub>2</sub> first for successful plume capture and then each pollutant if the CO<sub>2</sub> peak analysis was successful?

Start time: The vehicle pass time from the light barriers is used as a starting point. The PDA searches around the vehicle pass time for a sequence of increasing gradients (2 rising gradient above threshold or a very large gradient (> 10 x threshold)). The PDA "start range" time period was set in

this study to -2 s to 6 s around the vehicle pass. The first rising gradient is used as start time for integration.

Stop time: There are three mainly three criteria defined which stop the integration of a plume:

- The concentration level is below the determined BG concentration
- Another vehicle passed and the concentration gradient is again rising
- The maximum defined plume duration is reached. 25 s are used in this study.

In addition, two further criteria are defined which cross-check that the areas of CO<sub>2</sub> and pollutant agree (difference between the integrated areas and the stop time of the integration are not allowed to exceed defined values).

CO<sub>2</sub> emissions are first processed. Pollutant emissions are only processed for vehicles with valid CO<sub>2</sub> plume. After the CO<sub>2</sub> processing the pollutant emissions are processed. The start and stop times for the pollutants are independently determined compared to CO<sub>2</sub>. This is verified by QA measures. For the processing of the pollutant emissions there are two separate cases:

- 1) **Significant emitter (pollutant peaks detected):** For distinct pollutant plumes which were identified by the PDA: Integration of the pollutant concentration independent of the CO<sub>2</sub> signal. Afterwards the time frames of CO<sub>2</sub> and pollutant are compared and if start /stop time are in range and the duration is ok then the emission ratio is valid. After the integration of the pollutant length, start and stop times of CO<sub>2</sub> and pollutant are compared. There are maximum delay times defined and it is not allowed that the pollutant area is longer than the CO<sub>2</sub> area. These times can all be adapted with parameters in the algorithm.
- 2) **Low emitter:** For vehicle passes where only a CO<sub>2</sub> peak was captured (and no pollutant peak): Pollutant emissions are integrated over the same time period as the CO<sub>2</sub> signal.

We re-wrote section “2.2.2 Emission event processing” by providing more detailed (and better structured) information on the peak detection algorithm. We replaced Figure 3 (flow chart of the PDA) with a new flow chart that better describes the procedure.

---

A background concentration based on the minimum value before the passing time is likely biased low, which would overestimate the true integrated area of each pollutant. For instance, background BC concentrations might bounce around -2 to 4 µg m<sup>-3</sup> on a secondly basis. A running average shortly before the start of the peak would more accurately capture the true baseline ~0-1 µg m<sup>-3</sup>, rather than assuming a value of -2 µg m<sup>-3</sup>, if that was the minimum concentration before the passing time. Similarly, for CO<sub>2</sub> concentrations under high traffic conditions, the background concentrations can vary by ± 50 ppm. The choice in background value can have large impacts on the resulting emission factor, and these questions need to be better addressed in the manuscript, especially when considering the limit of detection for this system when calculating near-zero emission rates with low emission events (i.e., good DPF and SCR performance) for those plumes with weak capture (i.e., small CO<sub>2</sub> peak area) events.

We agree that the minimum value is likely biased low and causes overestimated integrated areas. We also agree that the BG determination has a large impact on the results, especially for low emitter. We adapted the algorithm for the minimum of a running average before the plume based on comparison of results with test vehicles equipped with PEMS. The background determination is one area (besides plume separation) where further improvements are possible. This should be evaluated in more detail in the future (especially for overlapping plumes).

We provide more detailed information on the BG determination in section “2.2.2 Emission event processing” and in section “3.1 TUG-PDA emission separation capabilities” for overlapping plumes (see comments blow).

We also added a suggestion in the conclusion regarding improvements: *“The BG determination for overlapping plumes can be improved with e.g. a linear approximation between the start and end of the emission peak used as continuous BG.”*

---

In Figure 4, you plot only positive values for BC, even though it looks like concentrations dip below zero for the background values before the peak events. Is this just a formatting choice for plotting this example, or does this mean that your algorithm ignores negative values? In this example, it doesn't seem to matter for the peak integration, since there is a strong BC signal. But for the case where there is no BC peak (or other pollutant) that corresponds to a CO<sub>2</sub> peak, those near-zero concentrations can be positive or negative. The negative values are valid and should be included in an emission factor calculation.

We thank the reviewer for this input and comment. The time series data are taken as measured by the instruments besides smoothing / interpolation which depends on the sampling frequency, response function, ... . Therefore, negative values are also included in the calculations. Important is always the difference between background and measured plume and not the absolute concentrations. The example is a bit misleading as the background is not subtracted in the figure. In addition, the black carbon tracker is currently slightly high biased (1-2 µg/m<sup>3</sup>). But the linearity is very good (basically 1 to reference equipment). Therefore, for point sampling where only BG subtracted concentrations matter it should not matter at all.

---

How were the thresholds for positive concentration gradient (Line 199) and minimum CO<sub>2</sub> integrated peak area (Line 214) determined? Are these also dependent on sampling configuration, driving and/or engine load conditions, environmental conditions, etc.?

The thresholds were determined based on tuning of the parameters and manual evaluations of the PDA by reviewing many (100s) of vehicle passes. Currently, the same thresholds were used for all sampling configurations etc. But this is a very good point and can be tested and adjusted in the future.

We added Table 2 with the used thresholds in section “2.2.2 Emission event processing” and added: *“The thresholds were determined based on a large number (100s) of manual reviews of TUG PDA results.”*

We refer to possible adaptive thresholds in the conclusion: *“Evaluation of adaptive instead of fixed thresholds and parameters which could depend on the sampling position and location.”*

---

Line 216–217: If instruments have different response times, the pollutant peak could extend beyond the CO<sub>2</sub> If you've smoothed the data (Lines 180–181) to force this scenario to not happen, how have you verified that this does not affect the corresponding emission ratio? You extensively discuss time alignment in Appendix E, but not in terms of this question.

We used instruments with similar response times (0.9 s to 2 s). By smoothing the data, we adjust the instrument responses. Sampling delays and response times of the instruments are aligned in the pre-

processing steps of the software. In addition, CO<sub>2</sub> and pollutant data are separately processed. For overlapping plumes results can deviate for overlapping plumes, despite all these actions. If instruments are used with significantly different response times (difference > 2-3 s), the responses must be matched accordingly.

We added in section “2.2.1 Pre-processing”: *“If instruments with large differences in response times ( $\Delta t > 2$  s) are used, the response function of the instruments must be aligned.”*

---

Lines 271–272: Do you determine if plumes can be separated and assigned clearly to a specific vehicle algorithmically via rules in TUG-PDA or with visual/manual inspection of TUG-PDA results? How do you QA/QC the data to verify that only valid emission factors that can be fully attributed to individual vehicles are included in the final dataset?

We thank the reviewer for pointing out the missing information regarding QA measures.

The whole emission processing is done automatically. Manual inspections are only applied for verification checks. There are several checks and QA measures included:

- Emissions of one vehicle are only considered if the spacing to the previous vehicle is larger than a predefined value (in this study 3 s).
- A rising plume (two positive gradients above threshold in the given sequence or a very strong gradient (> 10 times the threshold)) of must be in a defined window of the vehicle pass. For this study -2 s to 3 s around the vehicle pass are used.
- The detected gradient (plume) must not be from a previous vehicle. This is checked by checking if a vehicle with less than 5 s distance caused a plume which was not considered yet.
- The captured plume must have a minimum length of 6 samples (3 s at 2 Hz measurement rate)
- For pollutant:
  - If a pollutant plume was detected. The length of the plume must be smaller or equal to the CO<sub>2</sub> plume length.
  - The pollutant plume must not start before the CO<sub>2</sub> plume
  - They must at least overlap by 50 percent
  - The pollutant plume lasts not longer than a predefined value (8 s in this study) compared to the CO<sub>2</sub> plume
- For translation of emission ratios to emission factors: ANPR camera data and light barrier data are separately captured. The ANPR camera pictures are related to the light barrier pass times. There is a time difference between the ANPR camera time of the vehicle and the light barrier pass time. The light barrier pass time is very exact and one very important part that automated post-processing is feasible. The time of the ANPR camera capture is varying. Our algorithm relates the ANPR pass time to the LB time with the usage of the measured vehicle speed and acceleration by the light barriers. A matching is performed between these two times and the pair (between ANPR and LB) with the smallest time difference is matched together.

All of these criteria were verified by manually reviewing 100s of PDA results and adapting the algorithm accordingly.

We added in the revised section “2.2.2 Emission event processing” a description of the QA measures during the start (peak search):



“

- **Vehicle distance:** First, when a new vehicle pass is fetched, it is checked whether the distance to the next vehicle pass is sufficient ( $\geq 3$  s). If this is not the case, the processing for the current vehicle is stopped and the algorithm proceeds to the next vehicle. At this small spacing, there is a large uncertainty that emissions will be attributed to the wrong vehicle due to differences in the sampling delay between vehicles.
- **Interference:** The detected gradient (plume) must not be from a previous vehicle. The processing is skipped if a rising gradient (start condition) from the previous vehicle in a pre-defined time frame (default: 5 s) is found and the plume was not processed yet.
- **Pollutant vs CO<sub>2</sub> start time:** The pollutant plume must start in a pre-defined window compared to the CO<sub>2</sub> plume (default: -1 to 8 s).

“

And after the integration:

“

- **Duration:** The duration of the integrated plume must have a minimum length (default: 3 s).
- **Plume strength:** The CO<sub>2</sub> area must be greater than a defined minimum concentration (default: 80 ppm s).
- **CO<sub>2</sub> vs pollutant:** The CO<sub>2</sub> and pollutant areas must overlap by at least 50 percent.
- **CO<sub>2</sub> vs pollutant:** The CO<sub>2</sub> area must not be longer than a pre-defined factor compared to the pollutant area (default: pollutant area / CO<sub>2</sub> area > 0.6)

“

---

Results: I suggest combining and streamlining sections 3.2.1 and 3.2.2, as the results and discussion are presented together, can be a little difficult to tease apart as they are currently discussed, and the existing text can be a little repetitive. I think choice of measurement location as described in Lines 314–320 is probably the most important factor in terms of successful point sampling, and it is best to describe those characteristics first. The sampling position details at a given location are more nuanced, and could be combined to better complement each other after establishing what a good sampling location requires in terms of road properties, traffic conditions, and vehicle operation. For instance, the discussion on Lines 354–361 about road width are very similar to the discussion in Section 3.2.1 about tailpipe and sampling direction and sampling heights.

We thank the reviewer for this input and we agree that this can be simplified. With this detailed description we wanted to emphasize that there are several factors which influence the quality of the measurements. In addition to the measurement location, the sampling position is equally important. This is for example shown in Figure 6 for measurement location 3: When sampling from the road center, the capture rate is three times as high as compared from the right side of the road (especially at large lane widths).

We merged (old) sections “3.2.1 Sampling position” and “3.2.2 Measurement location” to “3.3.1 Measurement location”. In revised manuscript we describe the results in a more compact form.

---

Results: Consider combining Figures 6, 7, and 8b to be side-by-side, since the three are very similar and discussed together in Lines 305–312. It's difficult to synthesize all of the information presented in the current form while flipping back and forth between pages and plots.

We thank the reviewer for this suggestion and we agree that putting these figures side-by-side can simplify the interpretation.

We put the figures about sampling position, sampling height and lane width side-by-side. We also put the figures about VSP and median vehicle distance side-by-side. We moved (old) figures 5a (Distribution of CO<sub>2</sub> concentrations of the sampling positions) and 9 (Background concentrations) into the Appendix.

---

Results, Figure 6: The trend line seems like it might be showing the combined influence of sampling position and height. In particular, all of the middle sampling points occur at near-ground sample heights with high capture rates, compared to the left and right sampling results that span higher sampling heights and a broad range of capture rates. The combination of sampling position and height might be confounding this result/trend. What would these results look like if the left and right sampling configurations were also conducted at heights < 1cm, like the middle sampling results? How does the trend line shift if the middle results are excluded and only the >4 cm samples are included?

We agree with the assumption that the figure shows a combined influence of position and height. The influence of height can be seen particularly for measurement locations 1 and 2. The sampling location was slightly shifted up the street and the sample extraction was done at lower heights (described in lines 310 – 312). Roadside sampling positions were not conducted at heights < 1 cm mainly because of 2 reasons. 1) Often it is not possible due to the road conditions (e.g. side walk, ...) to sample at these low heights. 2) To be able to measure independent of rain, measurements were not performed at these low heights.

We will add a second trend line in the revised manuscript which represents only roadside sampling positions.

---

Results, Lines 325–326: If measurements are often made after a crossroad or traffic light, could there be a bias in the emission profiles observed? How does that driving mode compare to “typical” operation?

We agree with this assumption of the reviewer. This is a general problem of RES that the emission trends could be (high) biased by the sampling locations. In RES, measurements must be conducted such that the vehicles are under certain load to capture CO<sub>2</sub> emissions.

---

Results, Lines 382–383: Is the difference in capture rate noted for dry vs rainy conditions statistically significant? If not, I would suggest a slight re-wording of this paragraph that instead emphasizes that all of the results are comparable (like you do with the CO<sub>2</sub> and BC results), rather than pointing out minor differences in capture rate. Also, in this paragraph, you describe differences in average values for capture rate and CO<sub>2</sub> concentration, but median differences for BC emission ratios. Is there a reason for not reporting mean differences in BC emission ratios?

Results, Figure 10b: Can you clarify what is meant by the y-axis label of “mean BC ratio”? I assumed that these are distributions of measured emission ratios from individual peak events, but please describe what has been averaged if they are instead distributions of mean ratios.

We thank the reviewer for these suggestions. No there is no reason for not reporting mean differences. The description of Figure 10b) lacks the information that the result was achieved with a Monte Carlo simulation. An equal number of samples was 1,000 times drawn from each measurement location and the mean EF was calculated from these subsets. The boxplots show the distribution of these calculated mean EFs. In this way, all measurement sites contributed equally to the results, regardless of population size.

We will include the above mentioned points in description of the results in the revised manuscript.

---

Results, Line 477–478: If the emissions from previously passing vehicles are interfering with the measurement of the current vehicle, shouldn't your algorithm and QA/QC process screen those results out as an unsuccessful capture? If there is interference from other vehicles, then you do not have an accurate measure of an individual plume that can be attributed to the target vehicle and it should not be included in your results. Or, you can consider fleet trend results from combined plumes like in Dallmann et al (2011), but not attribute any vehicle-specific information from license plate data to those emission factors.

This is an interesting aspect. We explained the plume separation parameters and criteria in previous comments. The software allows to define several parameters to tune the plume separation. As mentioned in previous replies, this is a trade off between accuracy and number of measurements. We omitted plumes which are not separable or which overlap “too strongly”. But we use overlapping plumes where distinct peaks can be found for the individual vehicles and which are according to our plume separation criteria (“Minimum time to next vehicle”, “Minimum number of required samples for valid measurement”, “Time delta for previous vehicle check”).

The error coming along with overlapping plumes may cause a deviation for individual vehicles, but on a statistical basis for the whole fleet it has a small influence.

In addition, it should be kept in mind that interferences from other vehicles are also present in results from (commercial) open-path remote emission sensing devices.

---

Appendix A, Line 620: “When plumes overlap or impacts from other sources occur, this concentration may be underestimated.” This is an important point that I think should be emphasized in the main manuscript when describing how your algorithm handles vehicles that pass by in rapid succession, especially if you do not exclude them from your results.

We thank the reviewer for this suggestion.

We re-wrote section “2.2.2 Emission event processing” and moved an adjusted version of “Appendix C” into the results section to “3.1 TUG-PDA emission separation capabilities”. This should provide more detailed information on how overlapping plumes are handled.

---

Appendix C, Figure C1:

I'm confused by the shaded areas for CO<sub>2</sub> that extend all the way down to ~400 ppm CO<sub>2</sub>. From the time series, the background concentration looks to be more ~450 ppm, depending on the passing vehicle. Is your algorithm assuming a background concentration of ~400 ppm for all four vehicles? If so, this is an overstatement of the CO<sub>2</sub> peak areas. If not, and this is just a figure formatting choice, then I suggest instead either: (1) plotting background subtracted concentrations, (2) adjusting the secondary y-axis range so that the plot looks more like Figure 4, or (3) cutting off the shaded blue areas to only include the above-background portions of the peaks to represent the true peak areas included in the emission ratio calculations.

We thank the reviewer for these suggestions. In the highlighted areas the background was not subtracted. In Figure C1 a), the determined background for the vehicles varies and is between ~435 and 445 ppm.

We plot in the revised manuscript for (old) Figures C1 a) and b) the integrated areas without background.

---

Does the weak capture for V2 pass the minimum requirements for calculating an emission factor? That rise in CO<sub>2</sub> (~10 ppm) does not look strong enough above normal noise in background concentrations to be a successful capture. Would this be flagged in QA/QC?

We thank the reviewer for pointing this out. This is a border case and it depends on the configuration of the PDA if emissions from vehicle V2 are considered valid. In the presented results in the manuscript there was a bug in the background determination and therefore vehicle V2 was considered valid. In the latest updated version of the PDA the bug was fixed and we applied stricter rules (higher thresholds for CO<sub>2</sub> and pollutants, higher threshold for the CO<sub>2</sub> area) for omitting such cases.

In the revised manuscript results are updated including (old) Figure C1 a) (→ now Figure 5 a). Emissions from vehicle V2 are not considered valid.

---

A4 is not shaded in or labeled, as noted in Lines 668–669.

We thank the reviewer for pointing this out.

In the revised manuscript emissions from vehicle V4 are also highlighted.

---

Technical Corrections:

This might be a journal formatting requirement/preference, but it is sometimes hard to discern paragraph breaks without extra spaces between paragraphs or an indent at the start of a paragraph.

Figure placement throughout the manuscript doesn't always make sense. For instance, Figure 12 is discussed in Section 3.2.3 but appears halfway through Section 3.2.1, while Figure 13 is discussed in Section 3.2.3 but appears on the next page in the middle of Section 3.3. I realize this may be a journal formatting issue rather than one that the authors can address, but wanted to point it out in case it could be adjusted.

Suggest replacing occurrences where "1000s" was used with the word "thousands" (e.g., Abstract Line 9 and Intro Line 75)

Abstract, Line 13: define NO<sub>x</sub> as “nitrogen oxides (NO<sub>x</sub>)”

Introduction, Line 19: define NO<sub>x</sub> as “nitrogen oxides (NO<sub>x</sub>)”

Introduction, Line 23: suggest “malfunctioning”

Introduction, Line 44: define emission factors as “(EFs)” since that is how it is used throughout the paper

Results, Line 333: revise to “6,500” or “6500” depending on number format used throughout the manuscript; note that there are some inconsistencies throughout the manuscript that should be made uniform (e.g., “3000” on Line 334 versus “100,000” on Line 275)

Line 480: should be “...150 mg (kg fuel)<sup>-1</sup>”

Line 587: consider word choice substitution for harsh, maybe something like “challenging”

We thank the reviewer for all of these suggestions. We will include these suggestions accordingly in the revised manuscript.
